# Supplementary material for: Plasma Aldosterone Concentration as a Determinant for Statin Use among Middle-Aged Hypertensive Patients for Atherosclerotic Cardiovascular Disease
Source: J Clin Med. 2018 Oct 24;7(11):382. doi: 10.3390/jcm7110382 (PMC6262476; doi:10.3390/jcm7110382)
Supplement: Supplementary file 1 [file jcm-07-00382-s001.pdf]

# **Supporting Information**

Supplement to: Plasma Aldosterone Concentration as a Determinant for Statin Use among Middle-Aged Hypertensive Patients on Atherosclerosis Cardiovascular Disease

Figure S1: Major recommendations for statin therapy on 10-year ASCVD prevention under the ACC-AHA guideline recommendations

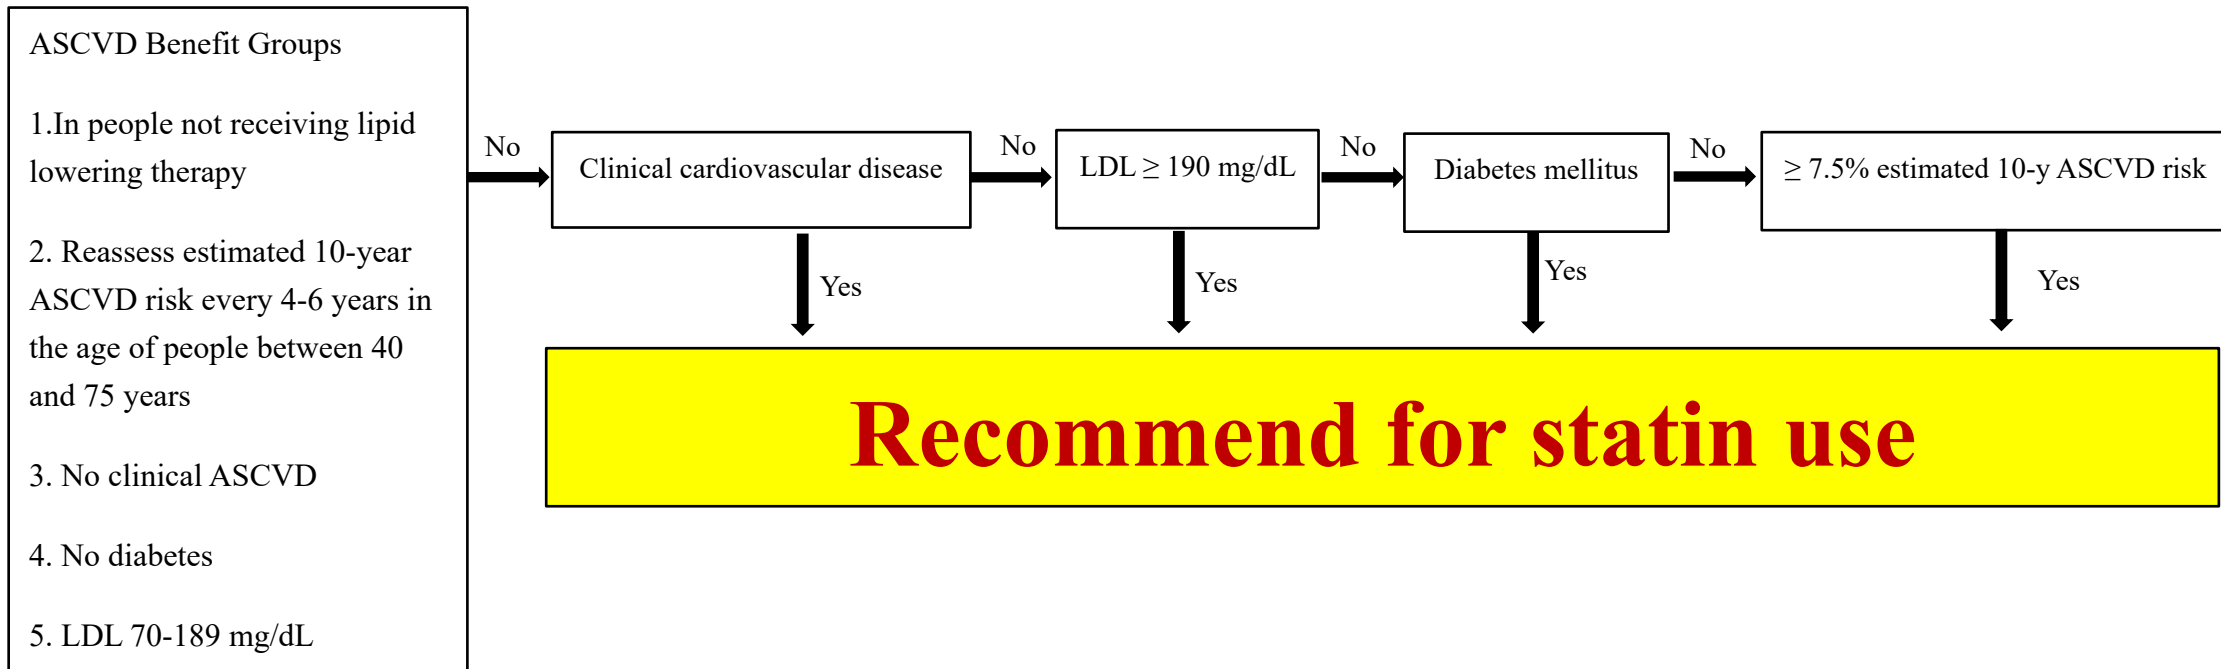

Abbreviations: ACC, American College of Cardiology; AHA, American Heart Association; ASCVD, atherosclerotic cardiovascular disease; LDL, low-density lipoprotein

Table S1. The sensitivity and specificity for 10-year ASCVD in middle-aged hypertensive patients with PA and EH by the recommendation of statin use based on the ACC/AHA guidelines

|                               | <b>Discriminative<br/>cut-off value</b> | <b>Sensitivity<br/>(95% CI)</b> | <b>Specificity<br/>(95% CI)</b> | <b>AUROC<br/>(95% CI)</b> | <b><i>p</i></b> |
|-------------------------------|-----------------------------------------|---------------------------------|---------------------------------|---------------------------|-----------------|
| <b>PA (<i>n</i> = 461)</b>    |                                         |                                 |                                 |                           |                 |
| <b>10-year<br/>ASCVD risk</b> | 7.5%                                    | 98.0%<br>(95.8, 99.3)           | 88.5%<br>(82.4, 93.0)           | 0.94<br>(0.91, 0.96)      | <0.001          |
| <b>EH (<i>n</i> = 533)</b>    |                                         |                                 |                                 |                           |                 |
| <b>10-year<br/>ASCVD risk</b> | 7.5 %                                   | 95.5% (92.7,<br>97.4)           | 91.0% (86.2,<br>94.6)           | 0.93 (0.91,<br>0.95)      | <0.001          |

Abbreviations: ACC, American College of Cardiology; AHA, American Heart Association; ASCVD, atherosclerotic cardiovascular disease; AUROC, area under receiver operating characteristic curve; CI, confidence interval; EH, essential hypertension; PA, primary aldosteronism.

Table S2. Demographic comparisons of enrollees between the PAC < 60 ng/dL and PAC  $\geq$  60 ng/dL groups.

|                                                                      | PAC <<br>60ng/dL<br>(n = 848) | PAC $\geq$<br>60ng/dL<br>(n = 146) | <i>p</i> |
|----------------------------------------------------------------------|-------------------------------|------------------------------------|----------|
| Age (years)                                                          | 52.6 $\pm$ 9.4                | 50.2 $\pm$ 9.3                     | 0.921    |
| Male gender (%)                                                      | 411 (48.5)                    | 60 (41.1)                          | 0.116    |
| Body mass index (Kg/m <sup>2</sup> )                                 | 25.5 $\pm$ 3.9                | 24.8 $\pm$ 3.5                     | 0.168    |
| Obesity (%)                                                          | 101 (11.9)                    | 12 (8.2)                           | 0.247    |
| Waist circumference (cm)                                             | 83.5 $\pm$ 10.8               | 80.8 $\pm$ 11.4                    | 0.452    |
| Systolic blood pressure (mmHg)                                       | 148.2 $\pm$ 22.1              | 150.5 $\pm$ 21.6                   | 0.753    |
| Diastolic blood pressure (mmHg)                                      | 88.2 $\pm$ 13.7               | 89.8 $\pm$ 14.4                    | 0.427    |
| Smoking status (%)                                                   | 106 (12.5)                    | 26 (17.8)                          | 0.107    |
| Diabetes mellitus (n,%)                                              | 106 (12.5)                    | 23 (15.8)                          | 0.344    |
| Left ventricular hypertrophy (n,%)                                   | 112 (13.2)                    | 31 (21.2)                          | 0.015*   |
| <b>Laboratory data</b>                                               |                               |                                    |          |
| PAC (ng/dL)                                                          | 31.2 $\pm$ 13.0               | 104.1 $\pm$ 144.1                  | <0.001*  |
| (nmol/L)                                                             | 0.9 $\pm$ 0.4                 | 2.9 $\pm$ 4.0                      |          |
| PRA (ng/mL/h)                                                        | 2.6 $\pm$ 6.3                 | 2.8 $\pm$ 8.3                      | <0.001*  |
| (pmol/L/h)                                                           | 61.6 $\pm$ 149.3              | 66.4 $\pm$ 196.7                   |          |
| Log ARR                                                              | 1.7 $\pm$ 0.9                 | 2.3 $\pm$ 0.9                      | 0.491    |
| Potassium (mmol/L)                                                   | 3.9 $\pm$ 0.7                 | 3.5 $\pm$ 0.8                      | 0.016*   |
| (mEq/L)                                                              | 3.9 $\pm$ 0.7                 | 3.5 $\pm$ 0.8                      |          |
| Fasting blood glucose (mg/dL)                                        | 99.9 $\pm$ 22.3               | 95.6 $\pm$ 18.2                    | 0.007*   |
| (mmol/L)                                                             | 5.5 $\pm$ 1.2                 | 5.3 $\pm$ 1.0                      |          |
| Total cholesterol (mg/dL)                                            | 196.1 $\pm$ 37.0              | 195.1 $\pm$ 36.9                   | 0.998    |
| (mmol/L)                                                             | 5.1 $\pm$ 1.0                 | 5.1 $\pm$ 1.0                      |          |
| Low density lipoprotein (mg/dL)                                      | 117.2 $\pm$ 32.4              | 115.8 $\pm$ 31.4                   | 0.632    |
| (mmol/L)                                                             | 3.0 $\pm$ 0.8                 | 3.0 $\pm$ 0.8                      |          |
| Low density lipoprotein $\geq$ 190 mg/dL (n,%)                       | 17 (2.0)                      | 4 (2.7)                            | 0.796    |
| High density lipoprotein (mg/dL)                                     | 47.1 $\pm$ 13.1               | 47.5 $\pm$ 12.6                    | 0.580    |
| (mmol/L)                                                             | 1.2 $\pm$ 0.3                 | 1.2 $\pm$ 0.3                      |          |
| Triglyceride (mg/dL)                                                 | 147.2 $\pm$ 108.3             | 129.3 $\pm$ 79.1                   | <0.001*  |
| (mmol/L)                                                             | 1.7 $\pm$ 1.2                 | 1.5 $\pm$ 0.9                      |          |
| Estimated glomerular filtration rate (mL/s per 1.73 m <sup>2</sup> ) | 80.9 $\pm$ 23.7               | 78.5 $\pm$ 31.1                    | <0.001*  |
| <b>Metabolic syndrome (n,%)</b>                                      | 345 (40.7)                    | 53 (36.3)                          | 0.365    |
| <b>Outcome</b>                                                       |                               |                                    |          |
| 10-year ASCVD (%) <sup>a</sup>                                       | 11.8                          | 11.4                               | 0.601    |

Abbreviations: ASCVD, atherosclerotic cardiovascular disease; ARR, aldosterone to renin ratio; EH, essential hypertension; PA, primary aldosteronism; PAC, plasma aldosterone concentration; PRA, plasma renin activity.

<sup>a</sup> ASCVD (atherosclerotic cardiovascular disease): myocardial infarction, other coronary heart disease, or stroke.
